# Supplementary figures and images for: An RCT Evaluating the Effects of Skills Training and Medication Type on Work Outcomes Among Patients With Schizophrenia
Source: Atypon-hosted journal article supplement (doi:10.1176/appi.ps.201500171), 2016-11-01

Figure 1 CONSORT CHART

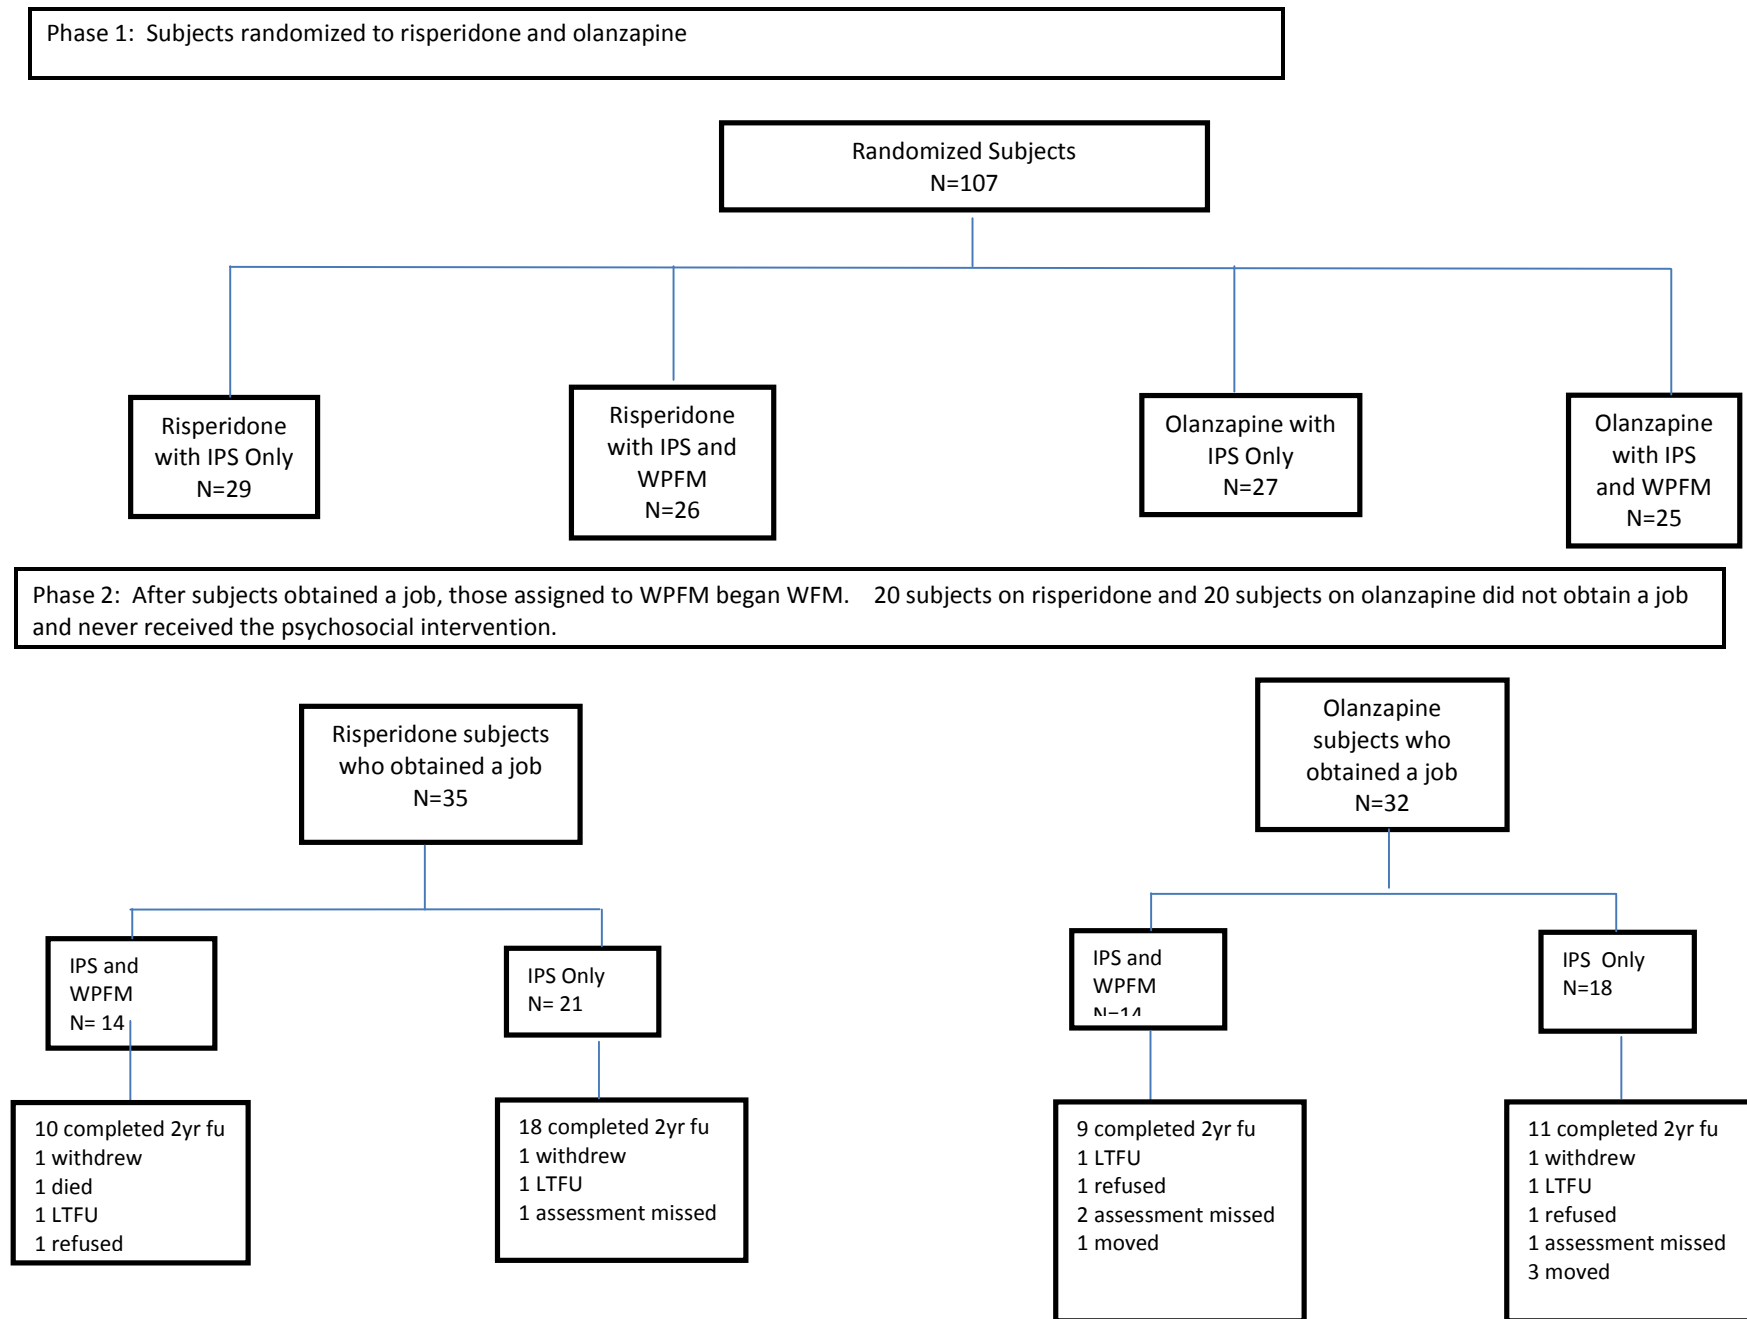

Supplement: appi.ps.201500171.ds001.pdf [file appi.ps.201500171.ds001.pdf]
